# Supplementary material for: Tumor-Immune Signatures of Treatment Resistance to Brentuximab Vedotin with Ipilimumab and/or Nivolumab in Hodgkin Lymphoma
Source: PubMed Central journal article supplement (PMC11247952; doi:10.1158/2767-9764.crc-24-0252), 2024-07-15

# Supplemental Figure 1

## A

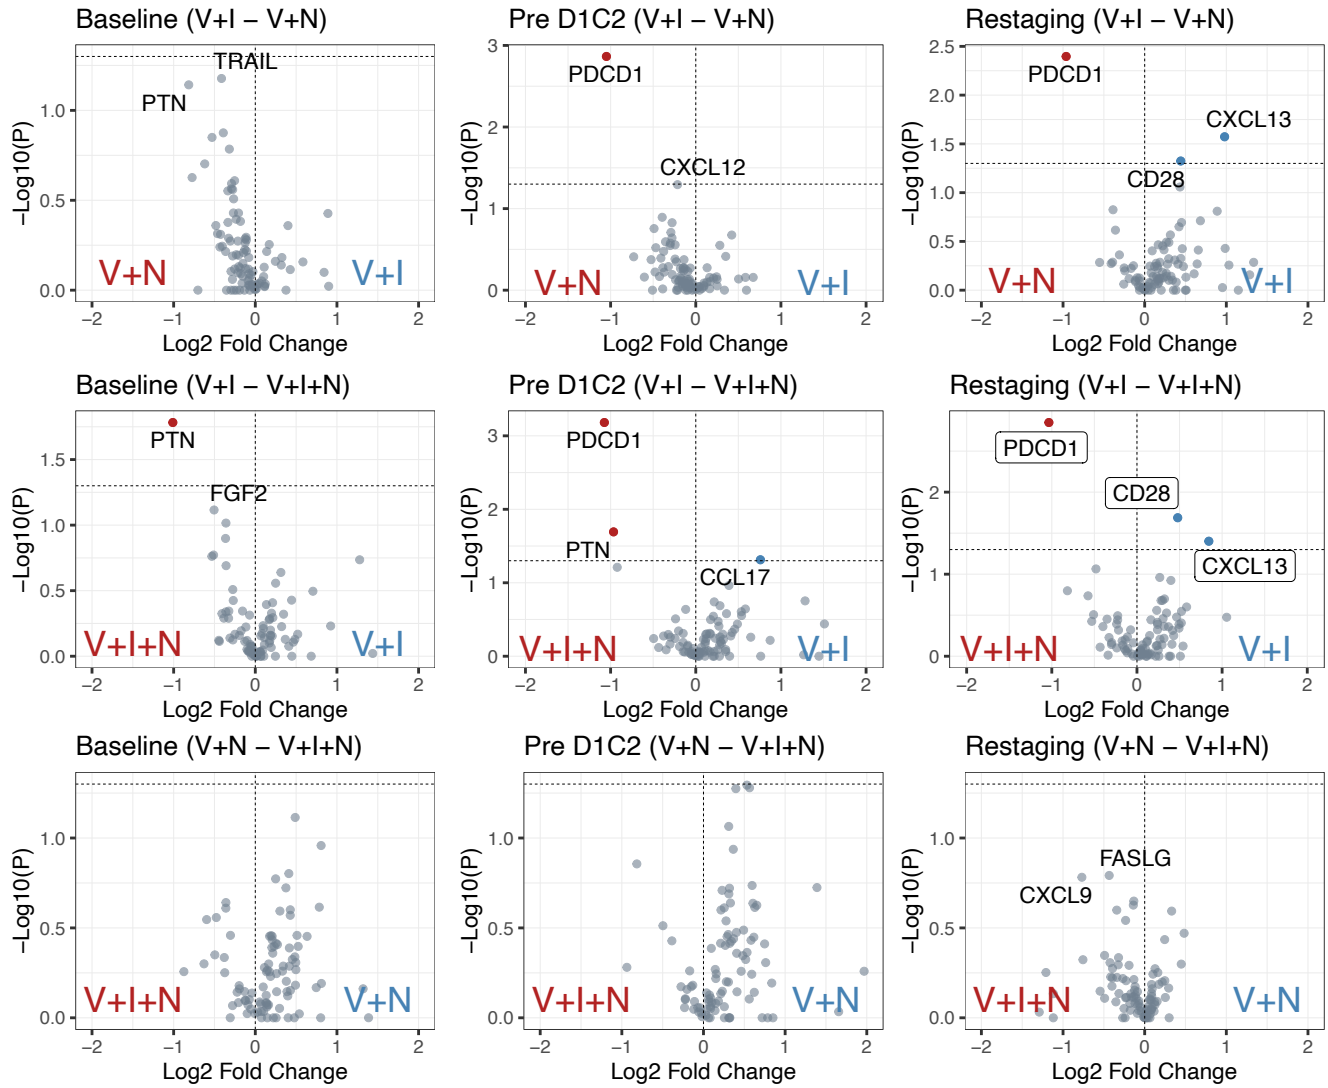

Supplement: crc-24-0252_figure_s1_supps1.pdf [file crc-24-0252_figure_s1_supps1.pdf]
