# Supplementary material for: Tumor-Immune Signatures of Treatment Resistance to Brentuximab Vedotin with Ipilimumab and/or Nivolumab in Hodgkin Lymphoma
Source: PubMed Central journal article supplement (PMC11247952; doi:10.1158/2767-9764.crc-24-0252), 2024-07-15

# Supplemental Figure 2

**A**

**Differential expression between treatments**  
(Populations with longitudinal with FDR<0.05 and LogFC>0.5)

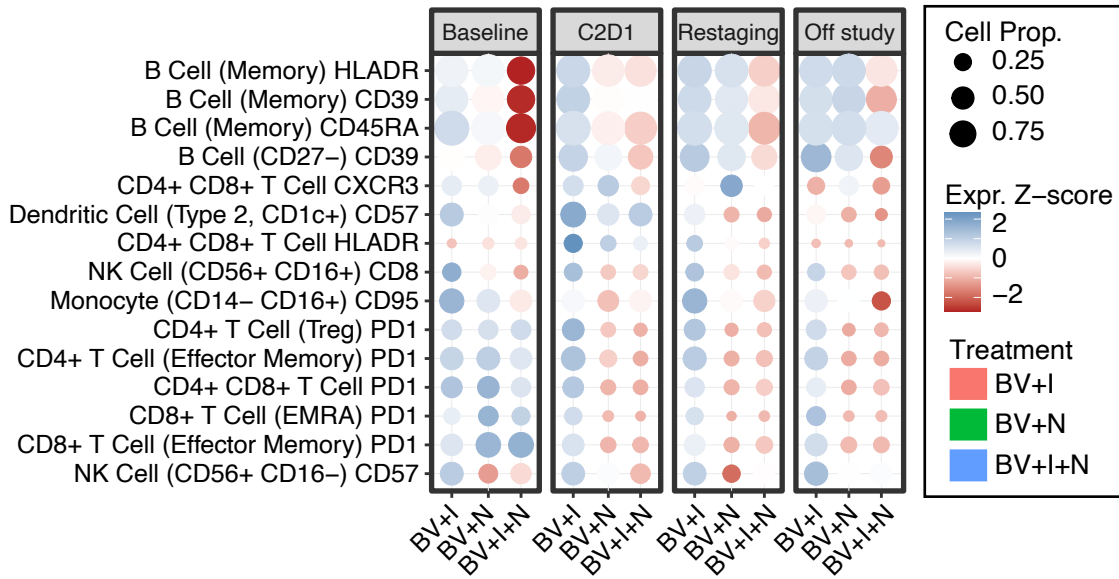

**B**

**Temporal changes for significant populations per treatment**

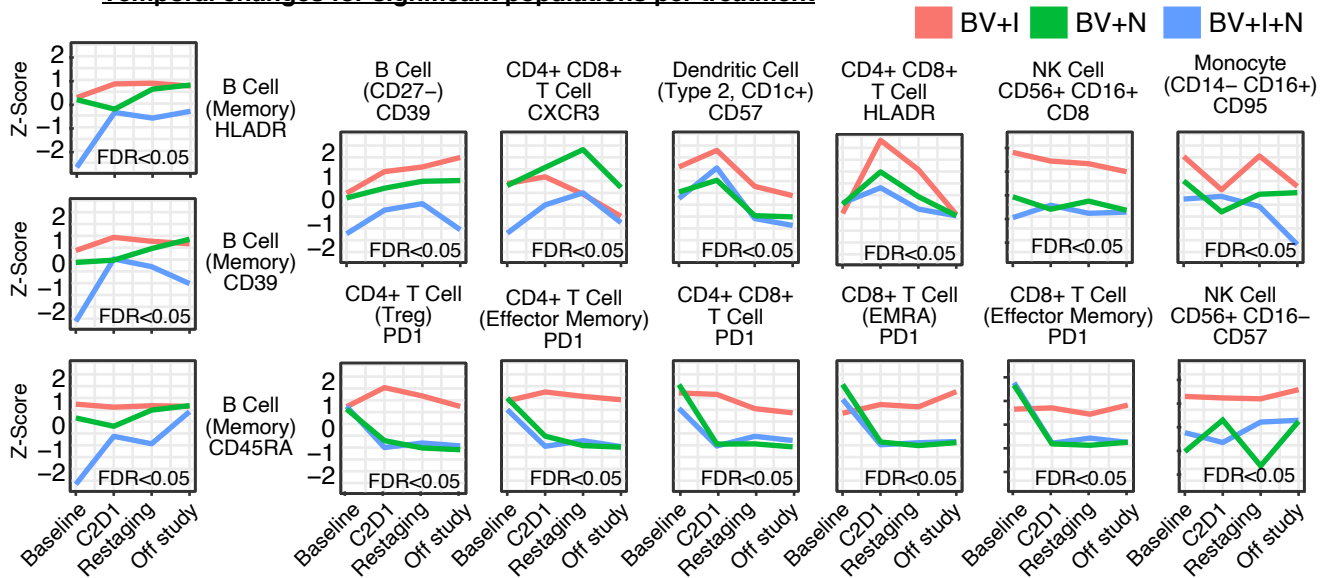

**C**

**Differential expression associated with Response**  
(Populations with NR vs R; FDR<0.05 and LogFC>0.5)

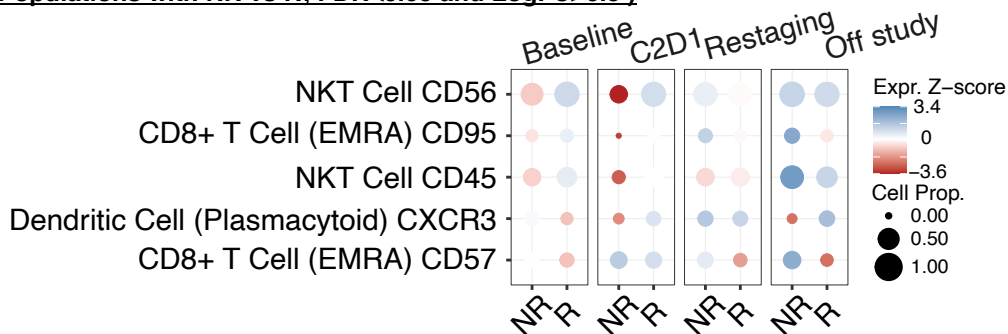

**D**

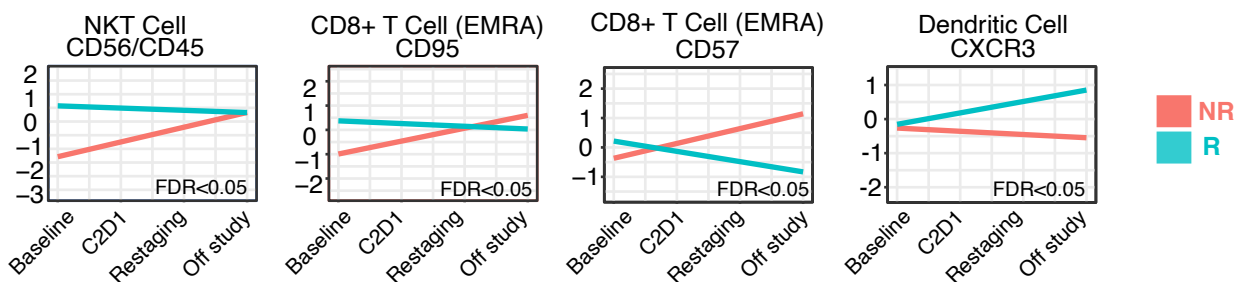

Supplement: crc-24-0252_figure_s2_supps2.pdf [file crc-24-0252_figure_s2_supps2.pdf]
