# Supplementary material for: Tumor-Immune Signatures of Treatment Resistance to Brentuximab Vedotin with Ipilimumab and/or Nivolumab in Hodgkin Lymphoma
Source: PubMed Central journal article supplement (PMC11247952; doi:10.1158/2767-9764.crc-24-0252), 2024-07-15

# Supplemental Figure 3

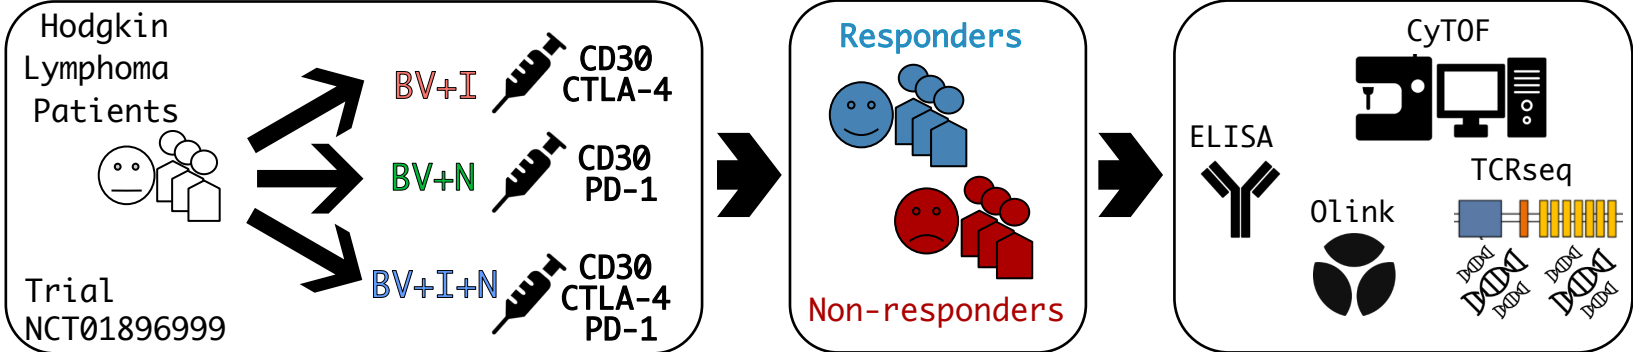

Increased with Treatment

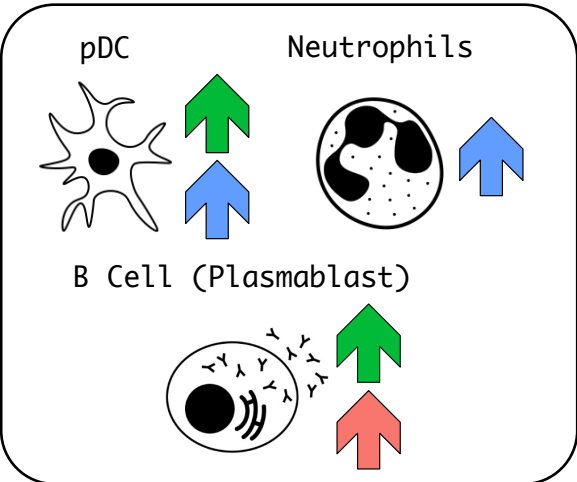

Treatment Response

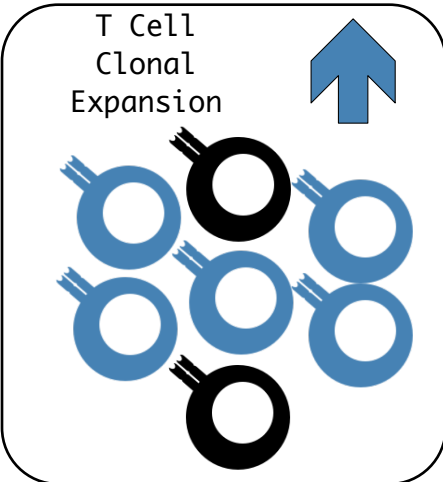

Treatment Resistance

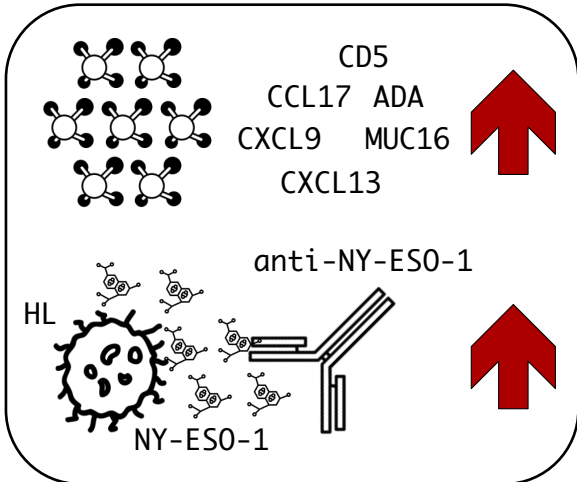

Supplement: crc-24-0252_figure_s3_supps3.pdf [file crc-24-0252_figure_s3_supps3.pdf]
